# Supplementary material for: Comparative sequence analysis of primate subtelomeres originating from a chromosome fission event
Source: HighWire-hosted journal article supplement (doi:10.1101/gr.083170.108), 2008-10-24
Supplement: Rudd_SuppTable4.pdf [file Rudd_SuppTable4.pdf]

Supplementary Table 4

| Rearrangement | Representative Accession | Coordinates |           |       | Repeat Element at Breakpoint (BP) |           | Species with identical BP <sup>+</sup> in available sequence | State of element at breakpoint: Crossing or Truncated |     | Original (vs. Derived) State | Rearrangement Type              | Size <sup>++</sup> (bp) | Inferred Mechanism |
|---------------|--------------------------|-------------|-----------|-------|-----------------------------------|-----------|--------------------------------------------------------------|-------------------------------------------------------|-----|------------------------------|---------------------------------|-------------------------|--------------------|
|               |                          | Left        | Right     |       | Left                              | Right     |                                                              |                                                       |     |                              |                                 |                         |                    |
| 1             | PAB_AC188481.3           | 120780      | 124140    | 3360  | L1M1                              | L1M1      | PAB, GGO                                                     | C                                                     | C   | O                            |                                 |                         |                    |
|               | MMU_AC150715.2           | 33597       |           |       | L1M1/L1M1*                        |           | MMU                                                          | T/T                                                   |     |                              | Deletion                        | 3360                    | NHEJ               |
| 2             | PAB_AC188481.3           | 128077      |           |       | L1M5                              |           | PAB, GGO                                                     | C                                                     |     | O                            |                                 |                         |                    |
|               | MMU_AC150715.2           | 36948       | 42414     | 5466  | L1M5                              | L1M5      | MMU                                                          | T                                                     | T   |                              | Insertion                       | 5466                    | LINE RT            |
| 3             | HSA_HG18                 | 100212678   |           |       | L1M3                              |           | HSA, PTR 15q                                                 | C                                                     |     | O                            |                                 |                         |                    |
|               | MMU_AC148535.2           | 36394       | 42556     | 6162  | L1M3                              | L1M3      | MMU                                                          | T                                                     | T   |                              | Insertion                       | 6162                    | LINE RT            |
| 4             | HSA_HG18                 | 100213018   | 100222547 | 9520  | LOR1-int                          | L2        | HSA, PTR 15q                                                 | C                                                     | C   | O                            |                                 |                         |                    |
|               | MMU_AC150715.2           | 134811      |           |       | LOR1-int                          | L2        | MMU                                                          | T/T                                                   |     |                              | Deletion                        | 9531                    | NHEJ               |
| 5             | HSA_HG18                 | 100239257   | 100242320 | 3063  | L1PA7                             | L1PA7     | HSA, PTR 15q, PTR 4q                                         | C                                                     | C   | O                            |                                 |                         |                    |
|               | MMU_AC148535.2           | 61701       |           |       | L1PA7/L1PA7**                     |           | MMU                                                          | T/T                                                   |     |                              | Deletion                        | 3063                    | NHEJ               |
| 6             | HSA_HG18                 | 100242452   | 100245066 | 2614  | L1PA7                             | ***       | HSA, PTR 15q, PTR 4q                                         | C                                                     | (C) | O                            |                                 |                         |                    |
|               | MMU_AC148535.2           | 61885       |           |       | L1PA7/THEID-int                   |           | MMU                                                          | T/T                                                   |     |                              | Deletion                        | ≥2614                   | NHEJ               |
| 7             | HSA_HG18                 | 100253145   | 100258937 | 5792  | -                                 | L1P4      | HSA, PTR 4q                                                  | -                                                     | C   | O                            |                                 |                         |                    |
|               | MMU_AC148535.2           | 67351       |           |       | -                                 | L1P4      | MMU                                                          | -T                                                    |     |                              | Deletion                        | ≥5792                   | NHEJ               |
| 8             | PAB_AC183330.3           | 29985       |           |       | L2C                               |           | PAB, HSA, PTR 4q                                             | C                                                     |     | O                            |                                 |                         |                    |
|               | MMU_AC148535.2           | 70211       | 74131     | 3920  | L2C                               | L2C       | MMU                                                          | T                                                     | T   |                              | Insertion                       | 3920                    | LINE RT            |
| 9             | PTR 4q_AC183669.3        | 63535       | 68394     | 4859  | L2                                | L1PA3     | PTR 4q                                                       | C                                                     | C   | O                            |                                 |                         |                    |
|               | MMU_AC148535.2           | 145306      |           |       | L2/L1PA3                          |           | MMU                                                          | T/T                                                   |     |                              | Deletion                        | 4859                    | NHEJ               |
| 10            | PAB_AC183330.3           | 165419      | 169603    | 4184  | -                                 | -         | PAB                                                          |                                                       |     |                              | Indel                           |                         |                    |
|               | MMU_AC148620.2           | 73570       |           |       | -                                 | +         | MMU                                                          |                                                       |     |                              |                                 | 4184                    | NHEJ               |
| 11            | PAB_AC183330.3           | 176355      | 181239    | 4884  | -                                 | L1P4      | PAB                                                          |                                                       | C   | O                            |                                 |                         |                    |
|               | MMU_AC148620.2           | 81629       |           |       | -                                 | L1P4      | MMU                                                          | -T                                                    |     |                              | Deletion                        | 4884                    | NHEJ               |
| 12            | MMU_AC150715.2           | 52580       | 55392     | 2812  | -                                 | Trigger3  | MMU                                                          |                                                       | C   | O                            |                                 |                         |                    |
|               | PAB_AC188481.3           | 137368      |           |       | -                                 | Trigger3  | PAB, GGO                                                     | -T                                                    |     |                              | Deletion                        | 2812                    | NHEJ               |
| 13            | HSA_HG18                 | 100200440   | 100213692 | 13252 | L1M1                              | LTR57-int | HSA, PTR 15q, PTR 4q                                         | C                                                     | C   | O                            |                                 |                         |                    |
|               | PAB_AC183330.3           | 13824       |           |       | L1M1/LTR57-int                    |           | PAB                                                          | T/T                                                   |     |                              | Deletion                        | 13252                   | NHEJ               |
| 14            | HSA_HG18                 | 100219570   | 100245066 | 25496 | MLTH1                             | ***       | HSA, PTR 15q, PTR 4q                                         | C                                                     | (C) | O                            |                                 |                         |                    |
|               | PAB_AC183330.3           | 18965       |           |       | MLTH1/THEID-int                   |           | PAB                                                          | T/T                                                   |     |                              | Deletion                        | ≥25496                  | NHEJ               |
| 15            | MMU_AC148535.2           | 67051       |           |       | AluY                              |           | MMU                                                          | C                                                     |     | O                            |                                 |                         |                    |
|               | HSA_HG18                 | 100248092   | 100252855 | 4763  | AluY                              | AluY      | HSA, PAB <sup>†</sup> , PTR 15q, PTR 4q                      | T                                                     | T   |                              | Insertion                       | 4763                    | LINE RT            |
| 16            | HSA_HG18                 | 100256905   | 100260556 | 3651  | L1MA9                             | L1ME3B    | HSA, PTR 4q                                                  | C                                                     | C   | O                            |                                 |                         |                    |
|               | PAB_AC183330.3           | 28542       |           |       | L1MA9/L1ME3B                      |           | PAB                                                          | T/T                                                   |     |                              | Deletion                        | 3651                    | NHEJ               |
| 17            | MMU_AC149242.2           | 36929       | 57419     | 20481 | L1MAC                             | -         | MMU, HSA, PTR 4q                                             | C                                                     |     | O                            |                                 |                         |                    |
|               | PAB_AC183330.3           | 33511       |           |       | L1MAC/-                           |           | PAB                                                          | T/-                                                   |     |                              | Deletion                        | 20480                   | NHEJ               |
| 18            | Inferred                 |             |           |       | L1MAC <sup>††</sup>               |           | Inferred                                                     | C                                                     |     | O                            |                                 |                         |                    |
|               | PAB_AC183330.3           | 33511       | 39774     | 6263  | L1MAC                             | -         | PAB                                                          | T                                                     |     |                              | Insertion                       | 6263                    | LINE RT            |
| 19            | PTR4q_AC183669.3         | 62153       | 72625     | 10472 | -                                 | AluSq     | PTR4q, MMU                                                   |                                                       | C   | O                            |                                 |                         |                    |
|               | PAB_AC183330.3           | 88155       |           |       | -                                 | AluSq     | PAB                                                          | -T                                                    |     |                              | Deletion                        | 10472                   | NHEJ               |
| 20            | MMU_AC148620.2           | 52576       | 58771     | 6195  | L1MC1                             | -         | MMU                                                          | C                                                     |     | O                            |                                 |                         |                    |
|               | PAB_AC183330.3           | 149153      |           |       | L1MC1/-                           |           | PAB, PTR 4q                                                  | T/-                                                   |     |                              | Deletion                        | 6195                    | NHEJ               |
| 21            | MMU_AC150715.2           | 16098       | 68983     | 52885 | -                                 | -         | MMU, PAB, GGO                                                |                                                       |     | O                            |                                 |                         |                    |
|               | HSA_HG18                 | 100155612   |           |       | -                                 | -         | HSA, PTR 15q                                                 |                                                       |     |                              | Deletion                        | 52885                   | NHEJ               |
| 22            | MMU_AC148535.2           | ***         | 64830     |       | -                                 | -         | MMU, PAB                                                     |                                                       |     | O                            |                                 |                         |                    |
|               | HSA_HG18                 | 100245068   |           |       | -                                 | -         | HSA, PTR 15q, PTR 4q                                         |                                                       |     |                              | Deletion                        | ≥2995                   | NHEJ               |
| 23            | MMU_AC149242.2           | 42064       | 50763     | 8699  | -                                 | L1PB      | MMU                                                          |                                                       | C   | O                            |                                 |                         |                    |
|               | HSA_HG18                 | 100269229   |           |       | -                                 | L1PB      | HSA                                                          | -T                                                    |     |                              | Deletion                        | 8700                    | NHEJ               |
| 24            | MMU_AC148535.2           | 94830       |           |       | L1MC4A                            |           | MMU                                                          | C                                                     |     | O                            |                                 |                         |                    |
|               | HSA_HG18                 | 100273152   | 100276019 | 2867  | L1MC4A                            | L1MC4A    | HSA, PTR4q                                                   | T                                                     | T   |                              | Insertion                       | 2867                    | LINE RT            |
| 25            | MMU_AC148535.2           | 127784      | ***       |       | LTR16C                            | AluSq/x   | MMU, PAB 15q, PTR 4q                                         | C                                                     | C   | O                            |                                 |                         |                    |
|               | HSA_HG18                 | 100307958   |           |       | LTR16C/AluSq/x                    |           | HSA                                                          | T/T                                                   |     |                              | Translocation-Mediated Deletion | ~160000                 | NHEJ               |
| 26            | HSA_HG18                 | 100258107   |           |       | AT-rich                           |           | HSA                                                          |                                                       |     | O                            |                                 |                         |                    |
|               | PTR4q_AC150448.2         | 94792       | 98005     | 3213  | AT-rich                           | AT-rich   | PTR4Q                                                        |                                                       |     |                              | Insertion                       | 3213                    | LINE RT            |
| 27            | MMU_AC148535.2           | 83068       | 89013     | 5945  | -                                 | L1PA5     | MMU                                                          |                                                       | C   | O                            |                                 |                         |                    |
|               | PTR4q_AC183669.3         | 169         |           |       | -                                 | L1PA5     | PTR4q                                                        | -T                                                    |     |                              | Deletion                        | 5945                    | NHEJ               |
| 28            | PAB_AC183330.3           | 104672      |           |       |                                   |           | MMU, PAB                                                     |                                                       |     | O                            |                                 |                         |                    |
|               | PTR4q_AC183669.3         | 89614       | 92759     | 3145  | -                                 | -         | PTR4q                                                        |                                                       |     |                              | Insertion                       | 3145                    | LINE RT            |
| 29            | MMU_AC148620.2           | 33295       | 33296     |       | -                                 | -         | MMU, PAB                                                     |                                                       |     | O                            |                                 |                         |                    |
|               | PTR 4q_AC183669.3        | 112843      | 117305    | 4462  | -                                 | -         | PTR4q                                                        |                                                       |     |                              | Insertion                       | 4462                    | SUZ12 RT           |

<sup>+</sup> Chromosome locations are MMU 7q, PAB 15q, HSA 15q, and GGO 15q unless denoted otherwise.

<sup>++</sup> When a deletion size is ≥ a value, this deletion encompasses or overlaps deletion(s) in all genomes and its true size cannot be determined.

\* These two Line elements are joined at nonhomologous sites

\*\* Deletion is internal to L1PA7.

\*\*\* THEID-int is truncated or missing from all genomes analyzed, but it can be inferred to have crossed the righthand breakpoint. It is missing from HSA due to rearrangement #22.

<sup>†</sup> Repeat masker incorrectly identifies the portion of the AluY to the right of this insertion as an AluSq. PAB lacks a portion of the insertion and the AluY sequence to the right of the breakpoint due to a sequencing gap.

<sup>††</sup> Insertion is at the right edge of the truncated L1MAC created by rearrangement #17, or, alternatively, rearrangement #17 occurred subsequent to this insertion and deleted part of it.

<sup>†††</sup> MMU & PAB are missing sequence for the lefthand breakpoint due to additional deletions (rearrangements 6 & 14).

<sup>††††</sup> Several human subtelomeres and the 2q fusion site retain block 2 sequence an intact Alu element crossing the other translocation breakpoint healed by NHEJ to create this join (Linardopoulou et al., 2005).

There is ~160 kb from the breakpoint of HSA15q and MMU7 sequence homology to the fission site.
